# Supplementary material
Source: PubMed Central journal article supplement (PMC4478794)
Supplement: supp_fj.15-270496_Supplemental_Figure2.pdf [file supp_fj.15-270496_Supplemental_Figure2.pdf]

A

Clinical parameters of obese insulin sensitive (n=7) and obese insulin resistant individuals (n=9).

|                          | Insulin Sensitive (IS) (n=7) | Insulin Resistant (IR) (n=9) |
|--------------------------|------------------------------|------------------------------|
| Age (years)              | 45.1 ± 3.0                   | 44.7 ± 3.6                   |
| Gender (F/M)             | 6/1                          | 5/4                          |
| Weight (kg)              | 115.4 ± 6.4                  | 137 ± 6.5*                   |
| BMI (kg/m <sup>2</sup> ) | 42.5 ± 2.3                   | 45.8 ± 1.3                   |
| Glucose (mg/dl)          | 93.3 ± 3.7                   | 99.3 ± 3.8                   |
| Insulin (mIU/L)          | 9.0 ± 1.7                    | 21.2 ± 1.8***                |
| HOMA2-IR                 | 1.3 ± 0.2                    | 3.1 ± 0.2***                 |

Data are presented as means ± SEM. \* p&lt;0.05; \*\*\*p&lt;0.001.

The HOMA2-IR is a calculation of the insulin sensitivity using the homeostasis model assessment calculator developed by the Diabetes Trials Unit from the University of Oxford, UK.

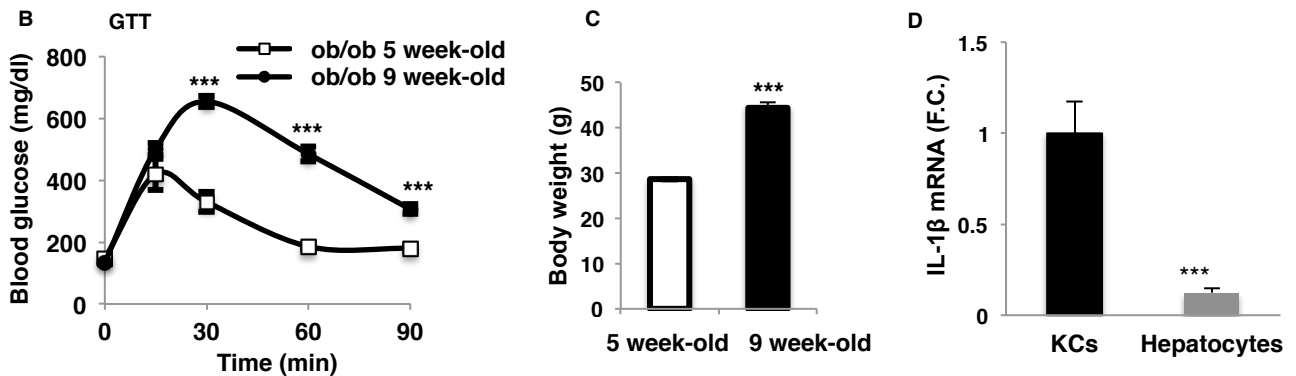

**Supplemental Figure S2: (A)** Clinical parameters of obese insulin sensitive (n=7) and obese insulin resistant individuals (n=9) matched for body mass index (BMI). **(B)** GTT (1g/kg) and **(C)** body weight (g) of 5-week and 9-week old *ob/ob* mice (n= 25). **(D)** IL-1β expression in KCs vs hepatocytes isolated from the same mouse (n = 5). Results are presented as mean ± SEM. \*\*\*p < 0.001. The statistical significance was analyzed by t-test.

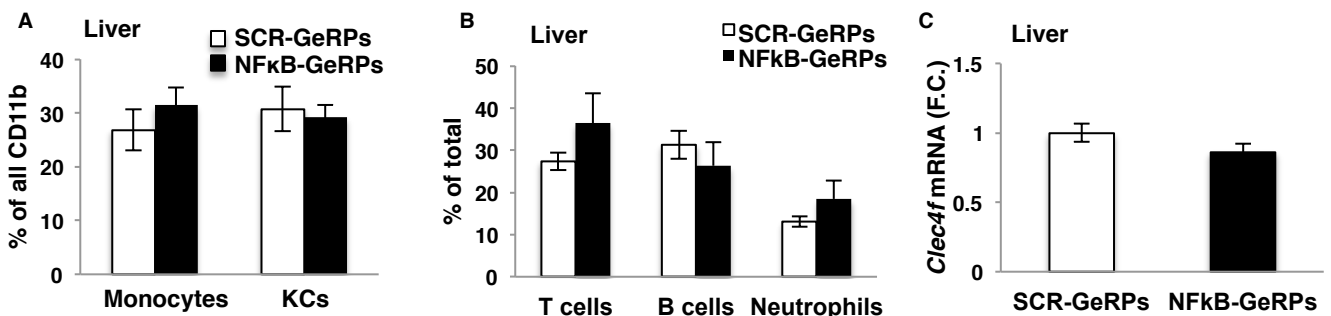

**Supplemental Figure S3: (A)** Relative content of monocytes/KCs, **(B)** lymphocytes and neutrophils in the liver of mice treated 5 days with SCR-GeRPs and NFκB-GeRPs measured by flow cytometry. (n= 5). **(C)** mRNA levels of *Clec4f* in liver of treated mice (n= 11-13). Results are presented as mean of F.C. normalized to SCR-GeRPs treated mice ± SEM. The statistical significance was analyzed by t-test.
